# Supplementary material for: ZnO@ZnS core/shell microrods with enhanced gas sensing properties
Source: Royal Society of Chemistry journal article supplement (doi:10.1039/c4ra12803f), 2014-12-03
Supplement: c4ra12803f1.pdf [file c4ra12803f1.pdf]

Supporting Information for

**ZnO@ZnS Core/shell Microrods with Enhanced Gas Sensing Properties**

*Wei Zhang, Shurong Wang\*, Yanshuang Wang, Zhenyu Zhu, Xueling Gao, Jiedi Yang, and Hong xin Zhang*

*Tianjin Key Lab of Metal and Molecule-based Material Chemistry, Department of Chemistry, Nankai University, Tianjin, 300071, China*

\*Corresponding author: Tel.: +86–22–23505896; fax: +86–22–23502458

E-mail: [shrwang@nankai.edu.cn](mailto:shrwang@nankai.edu.cn)

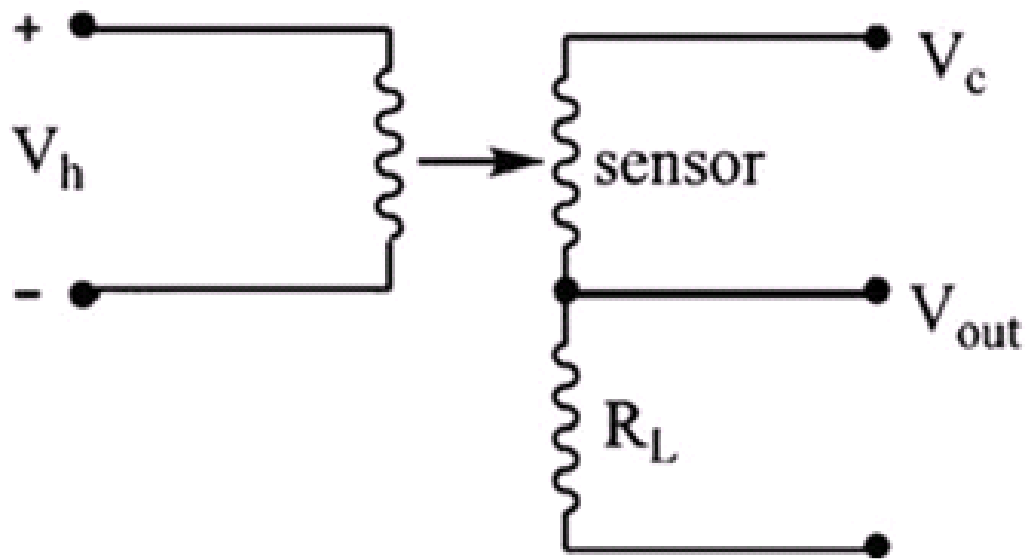

**Figure S1.** Working principle of gas sensor test.  $V_h$ : Heating voltage;  $V_{out}$ : Output signal voltage;  $V_c$ : Test circuit voltage;  $R_L$ : Load resistance.

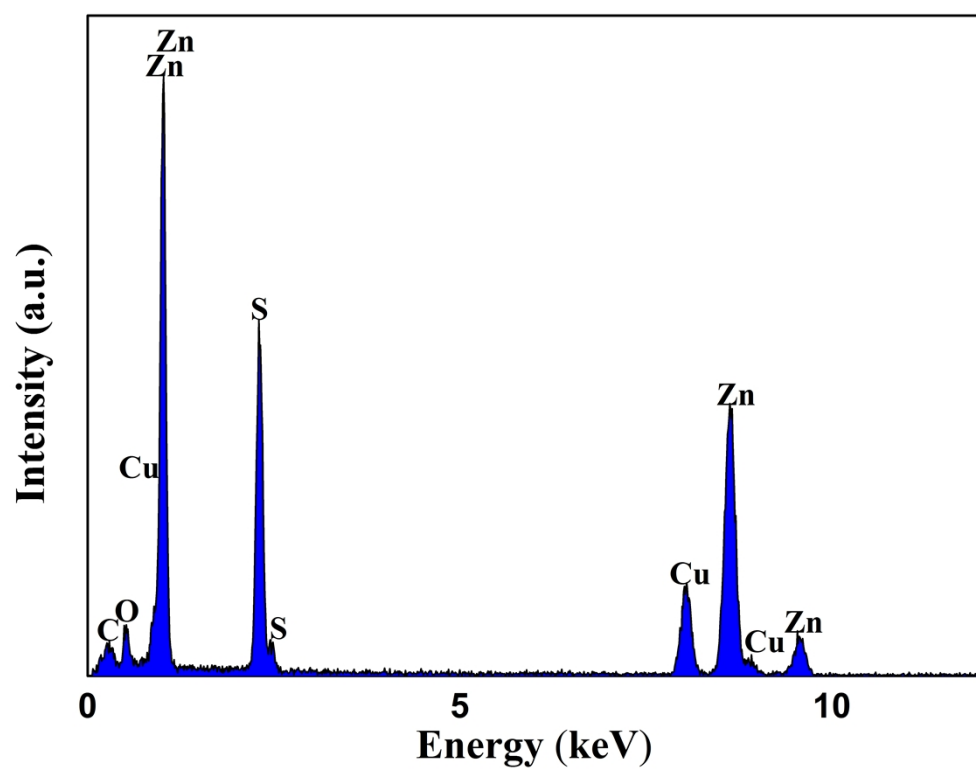

**Figure S2.** The corresponding EDS spectrum of the ZnO@ZnS core/shell MRs.

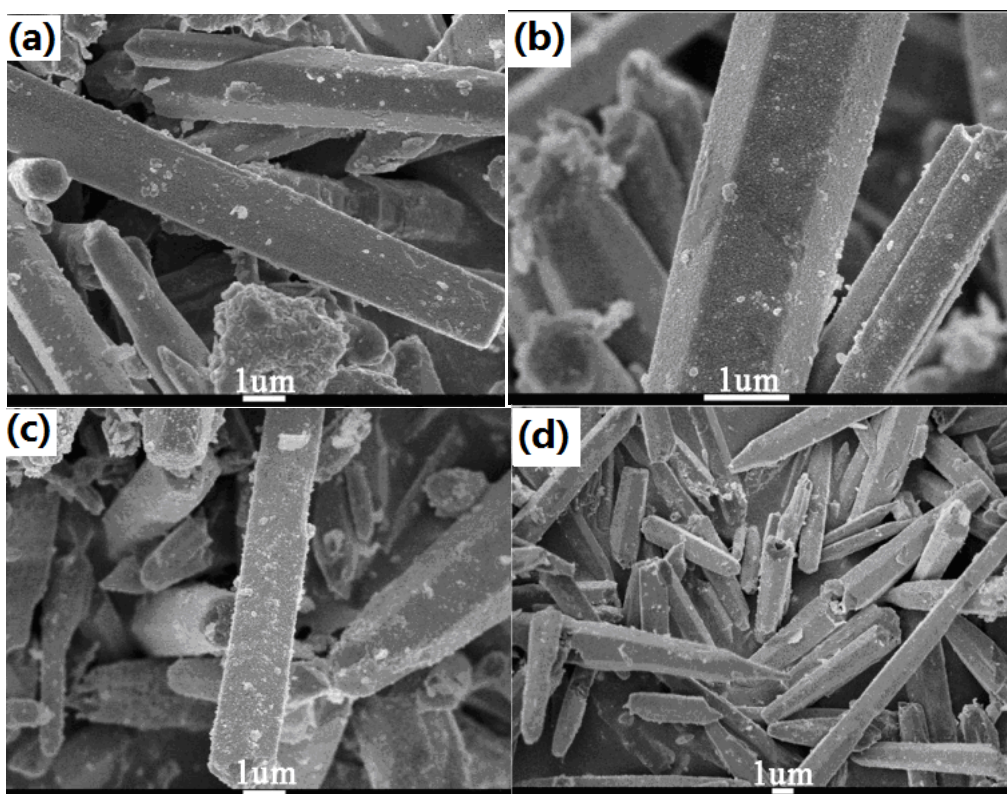

**Figure S3.** SEM images of ZnO@ZnS MRs sulfurized in Na<sub>2</sub>S solution for (a) 12 h, (b) 16 h, (c) 20 h, and (d) 28 h.

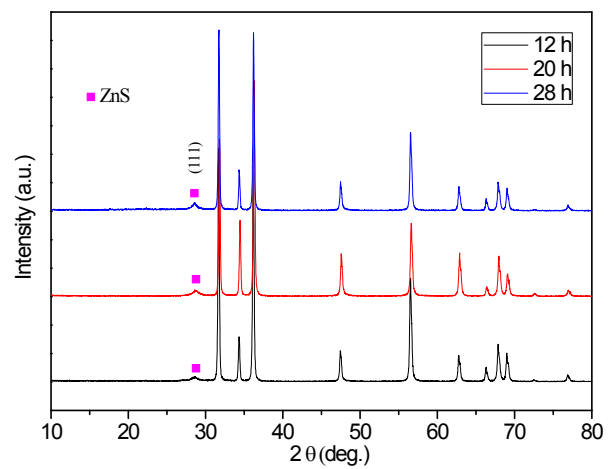

**Figure S4.** XRD patterns of the ZnO@ZnS core/shell MRs sulfurized for different times.

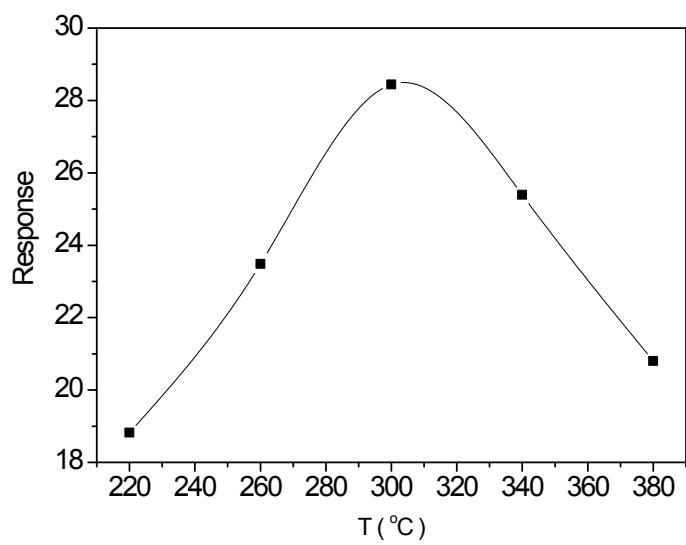

**Figure S5.** Response of the ZnO@ZnS core/shell MR sensor to 100 ppm n-butanol at different temperature.

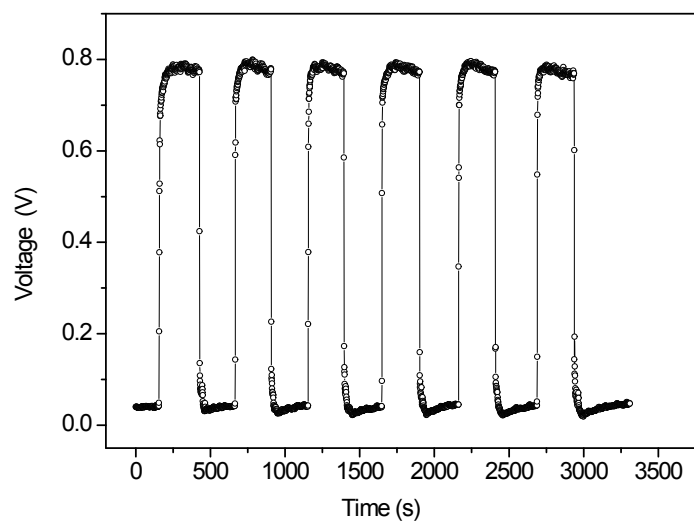

**Figure S6.** Reproducibility of the ZnO@ZnS core/shell MR based sensor on successive 100 ppm of n-butanol.
